# Supplementary material
Source: Springer Nature journal article supplement (https://www.springermedizin.de/resource/supplementary/12877_2009_177_MOESM1_ESM.pdf/9441336)
Supplement: MOESM1 [file 9441336]

Initially interviewed  
in 2001  
N=4872 age 65+

N=449 proxy respondents.  
Older, higher mortality

Directly interviewed  
N=4423

196 lost to follow-up  
Better educated and higher  
income

Followed-up in 2003  
N=4227

Missing frailty index data.  
N=145. Higher income and mortality, rural  
residence more likely.

Frailty index  
complete  
N=4082  
Average age = 73.0  
52.5% Female

279 died

3803 survived
